# Supplementary material for: Reversible complexation of isocyanides by the distannyne Ar′SnSnAr′ (Ar′ = C6H3-2,6(C6H3-2,6-iPr2)2)
Source: Royal Society of Chemistry journal article supplement (doi:10.1039/b919828h), 2010-01-01

## Supplementary Information

### Reversible Complexation of Isocyanides by the Distannyne Ar'SnSnAr' (Ar' = C<sub>6</sub>H<sub>3</sub>-2, 6 (C<sub>6</sub>H<sub>3</sub>-2, 6-<sup>i</sup>Pr<sub>2</sub>)<sub>2</sub>)

Yang Peng, Xinping Wang, James C. Fettinger, and Philip P. Power\*

#### 1. Determination of ΔH<sub>assn</sub> by temperature-dependent NMR spectroscopy

The association enthalpy ΔH<sub>assn</sub> can be derived from the temperature dependence of the equilibrium constant K<sub>eq</sub>. (Table S1, Figure S1).

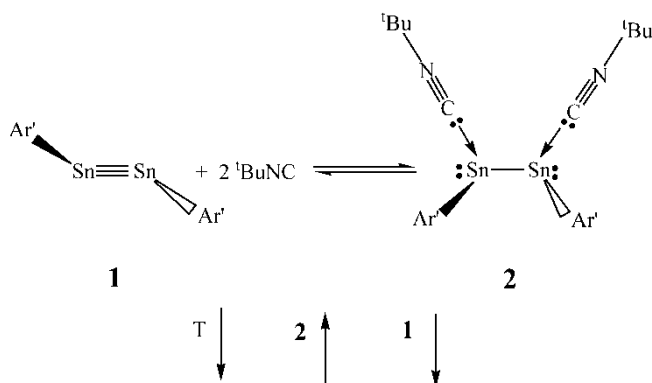

$$(1) \ln K_{eq} = -\frac{\Delta H}{R} \left( \frac{1}{T} \right) + \frac{\Delta S}{R} \quad (2) K_{eq} = \frac{[2]}{[1] [{}^t\text{BuNC}]^2}$$

**Table S1.** Variable Temperature <sup>1</sup>H NMR and Temperature Data for 1 ⇌ 2 + 2<sup>t</sup>BuNC

|         |          |                               |     |
|---------|----------|-------------------------------|-----|
| Moles   | 1.40E-05 | uncertainty <sup>a</sup> in T | 1.0 |
| Vol (L) | 0.0060   | uncertainty <sup>a</sup> in I | 5%  |

#### <sup>1</sup>H NMR Integration Data

| Temperature | I <sub>1</sub> (free Ar'SnSnAr') |
|-------------|----------------------------------|
| 295.15      | 58.08                            |
| 258.15      | 23.11                            |
| 248.15      | 18.96                            |
| 238.15      | 17.86                            |
| 223.15      | 14.4                             |

#### Integration Data for 1, <sup>t</sup>BuNC and 2

| Temperature | I <sub>1</sub> (free Ar'SnSnAr') | I <sub>2</sub> ( <sup>t</sup> BuNC) | I <sub>3</sub> (complex 2) |
|-------------|----------------------------------|-------------------------------------|----------------------------|
| 258.15      | 23.11                            | 46.22                               | 36.71                      |
| 248.15      | 18.96                            | 37.92                               | 40.86                      |
| 238.15      | 17.86                            | 35.72                               | 41.96                      |
| 223.15      | 14.4                             | 28.8                                | 45.42                      |

| Temperature | Concentration of <b>1</b><br>(Ar'SnSnAr') | Concentration of<br><sup>t</sup> BuNC | Concentration of<br>complex <b>2</b> |
|-------------|-------------------------------------------|---------------------------------------|--------------------------------------|
| 258.15      | 0.009014                                  | 0.018029                              | 0.014319                             |
| 248.15      | 0.007396                                  | 0.014791                              | 0.015938                             |
| 238.15      | 0.006966                                  | 0.013933                              | 0.016367                             |
| 223.15      | 0.005617                                  | 0.011234                              | 0.017716                             |

| Temperature | K        | $\Delta G$ (J/mol) | $\Delta G$ (kJ/mol) |
|-------------|----------|--------------------|---------------------|
| 258.15      | 4887.242 | -18231.1           | -18.2311            |
| 248.15      | 9850.599 | -18971             | -18.971             |
| 238.15      | 12102.37 | -18614.1           | -18.6141            |
| 223.15      | 24994.18 | -19208.1           | -19.2081            |

| T (K)  | ln K     | 1/T      |
|--------|----------|----------|
| 258.15 | 8.494383 | 0.003874 |
| 248.15 | 9.195287 | 0.00403  |
| 238.15 | 9.401156 | 0.004199 |
| 223.15 | 10.1264  | 0.004383 |

| Slope/Intercept | 3003.6              | -3.0748             |
|-----------------|---------------------|---------------------|
|                 | $\Delta H$ (kJ/mol) | $\Delta S$ (J/molK) |
|                 | -25.0               | -25.6               |

At 298.15K,  $\Delta G = -17.4 \text{ kJmol}^{-1}$

### Equilibrium Constant Data for (Ar'Sn)<sub>2</sub> and <sup>t</sup>BuNC

ln K

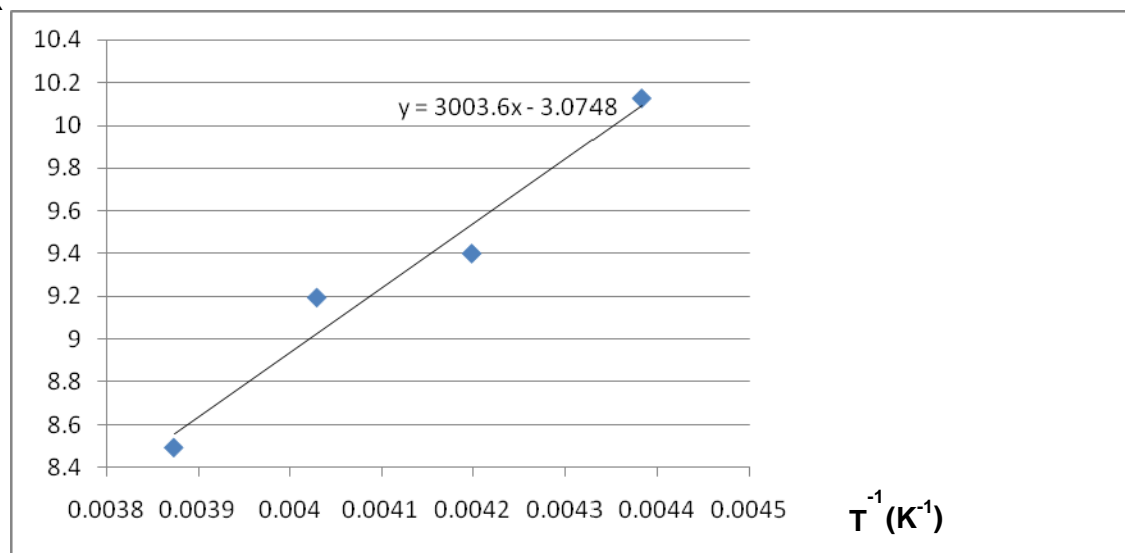

**Figure S1.** Plot of lnK versus  $T^{-1}$  for  $1 \rightleftharpoons 2 + 2^t\text{BuNC}$

## 2. Determination of $\Delta H_{\text{assn}}$ by temperature-dependent NMR spectroscopy

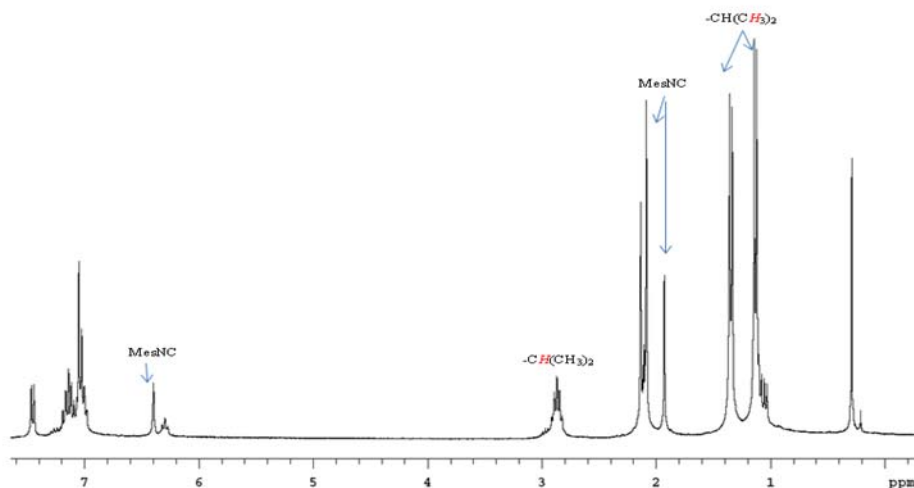

$^1\text{H}$  NMR spectrum of complex **3** which completely dissociates to **1** and MesNC at room temperature.

The association enthalpy  $\Delta H_{\text{assn}}$  can be derived from the temperature dependence of the equilibrium constant  $K_{\text{eq}}$ . (Table S2, Figure S2)

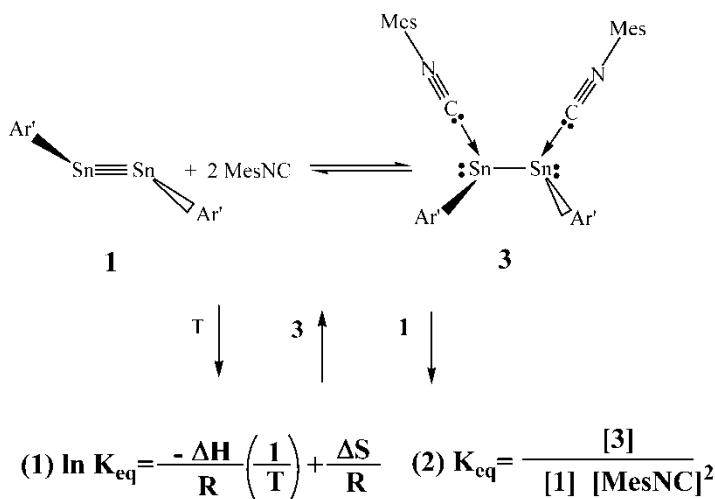

**Table S2.** Variable Temperature  $^1\text{H}$  NMR and Temperature Data for  $\text{1} \rightleftharpoons \text{3} + 2 \text{MesNC}$

|         |          |                               |     |
|---------|----------|-------------------------------|-----|
| moles   | 1.56E-05 | uncertainty <sup>a</sup> in T | 1.0 |
| Vol (L) | 0.0053   | uncertainty <sup>a</sup> in I | 5%  |

$^1\text{H}$  NMR Integration Data

| emperature | I <sub>1</sub> (free Ar'SnSnAr') |
|------------|----------------------------------|
| 295.15     | 111.63                           |
| 290.15     | 104.81                           |
| 288.15     | 102.87                           |
| 258.15     | 27.6                             |
| 253.15     | 13.5                             |
| 243.15     | 10.41                            |

Integration Data for **1**, MesNC and **3**

| Temperature | I <sub>1</sub> (free Ar'SnSnAr') | I <sub>2</sub> (MesNC) | I <sub>3</sub> (complex <b>3</b> ) |
|-------------|----------------------------------|------------------------|------------------------------------|
| 290.15      | 104.81                           | 209.62                 | 6.82                               |
| 288.15      | 102.87                           | 205.74                 | 8.76                               |
| 258.15      | 27.6                             | 55.2                   | 84.03                              |
| 253.15      | 13.5                             | 27                     | 98.13                              |
| 243.15      | 10.41                            | 20.82                  | 101.22                             |

| Temperature | Concentration of <b>1</b><br>(Ar'SnSnAr') | Concentration of<br>MesNC | Concentration of<br>complex <b>3</b> |
|-------------|-------------------------------------------|---------------------------|--------------------------------------|
| 290.15      | 0.027636                                  | 0.055271                  | 0.001798                             |
| 288.15      | 0.027124                                  | 0.054248                  | 0.00231                              |
| 258.15      | 0.007277                                  | 0.014555                  | 0.022157                             |
| 253.15      | 0.00356                                   | 0.007119                  | 0.025874                             |
| 243.15      | 0.002745                                  | 0.00549                   | 0.026689                             |

| Temperature | K        | ΔG (J/mol) | ΔG (kJ/mol) |
|-------------|----------|------------|-------------|
| 290.15      | 21.30005 | -7378.55   | -7.37855    |
| 288.15      | 28.93625 | -8061.69   | -8.06169    |
| 258.15      | 14371.81 | -20546.2   | -20.5462    |
| 253.15      | 143418.4 | -24990.1   | -24.9901    |
| 243.15      | 322640.2 | -25641.9   | -25.6419    |

| T (K) | ln K     | 1/T      |
|-------|----------|----------|
| 295   | 3.058709 | 0.003446 |
| 303   | 3.365095 | 0.00347  |
| 308   | 9.573024 | 0.003874 |
| 313   | 11.87352 | 0.00395  |
| 318   | 12.68429 | 0.004113 |

|                 |             |             |
|-----------------|-------------|-------------|
| Slope/Intercept | 15358       | -49.799     |
|                 | ΔH (kJ/mol) | ΔS (J/molK) |
|                 | -127.7      | -414.0      |

At 298.15K, ΔG = - 4.3 kJmol<sup>-1</sup>

a. The uncertainty in the integrations was estimated to be a typical 5%. The specifications of the VT apparatus indicated that the uncertainty of the temperature was 1°C. The concentration of **2** and **3** were accurate to ca. 1% to yield overall uncertainty of 8% for the data.

### Equilibrium Constant Data for (Ar'Sn)<sub>2</sub> and MesNC

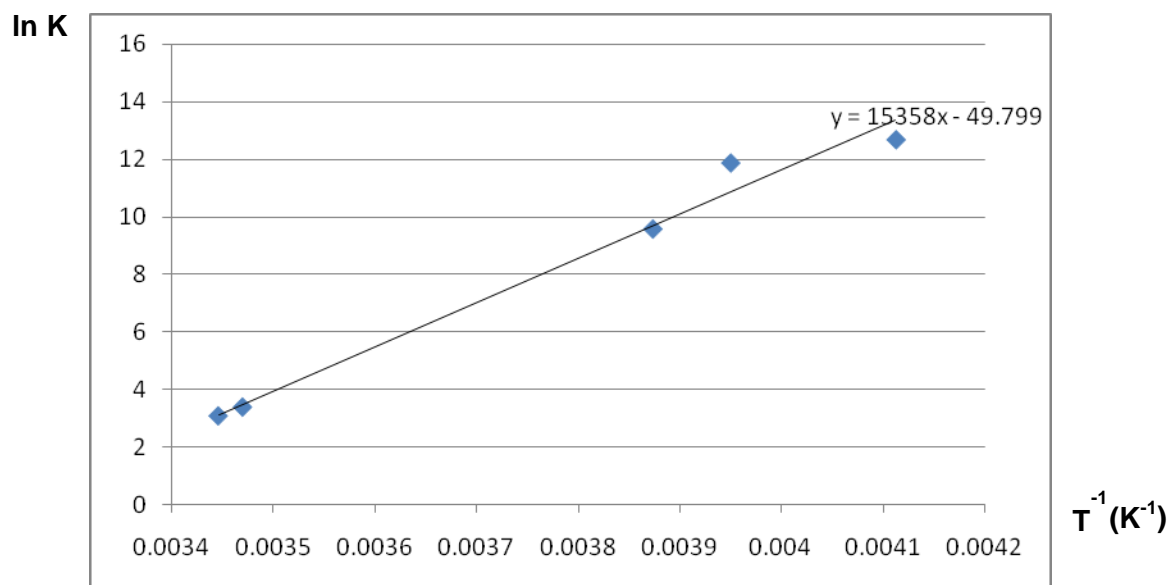

**Figure S2.** Plot of lnK versus T<sup>-1</sup> for  $1 \rightleftharpoons 3 + 2 \text{ MesNC}$

### 3. Variable temperature behavior of the UV-vis spectrum illustrating the dissociation of **3** to **1** and free MesNC

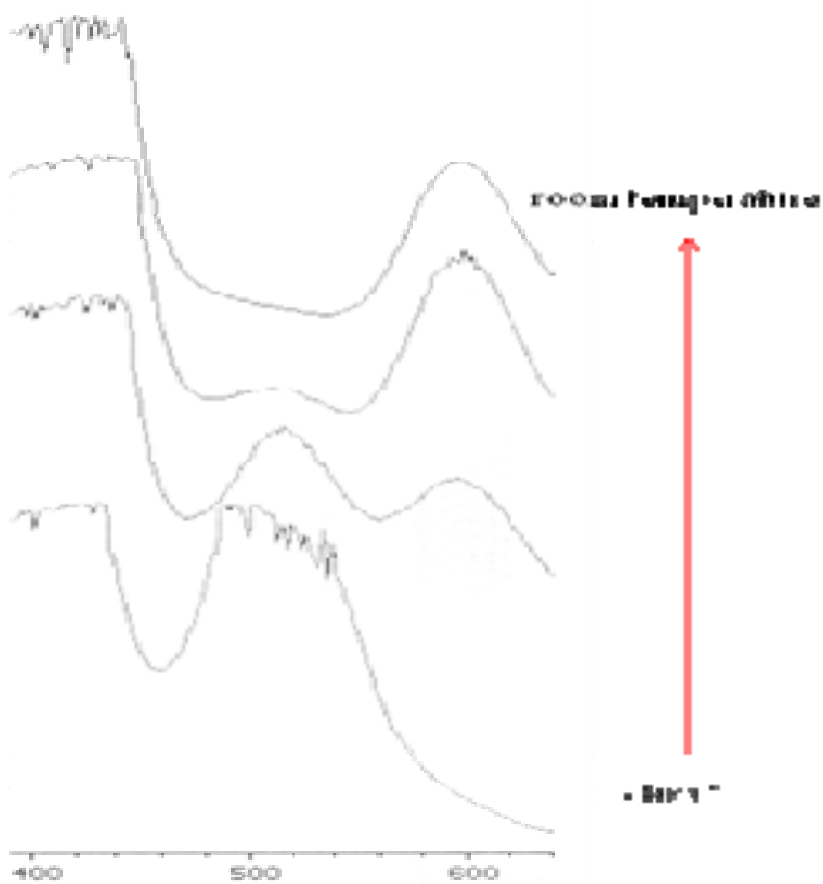

Supplement: b919828h.pdf [file b919828h.pdf]
